# Supplementary material for: Fabrication of Pd/P nanoparticle networks with high activity for methanol oxidation
Source: Royal Society of Chemistry journal article supplement (doi:10.1039/c6cy00789a), 2016-01-01
Supplement: c6cy00789a1.pdf [file c6cy00789a1.pdf]

## Electronic Supplementary Information

### Fabrication of Pd/P nanoparticle networks with high activity for methanol oxidation

Ke Zhang, Caiqin Wang, Duan Bin, Jin Wang, Bo Yan, Yukihide Shiraishi, and  
Yukou Du\*

College of Chemistry, Chemical Engineering and Materials Science, Soochow University, Suzhou  
215123, P. R. China. E-mail: [duyk@suda.edu.cn](mailto:duyk@suda.edu.cn)

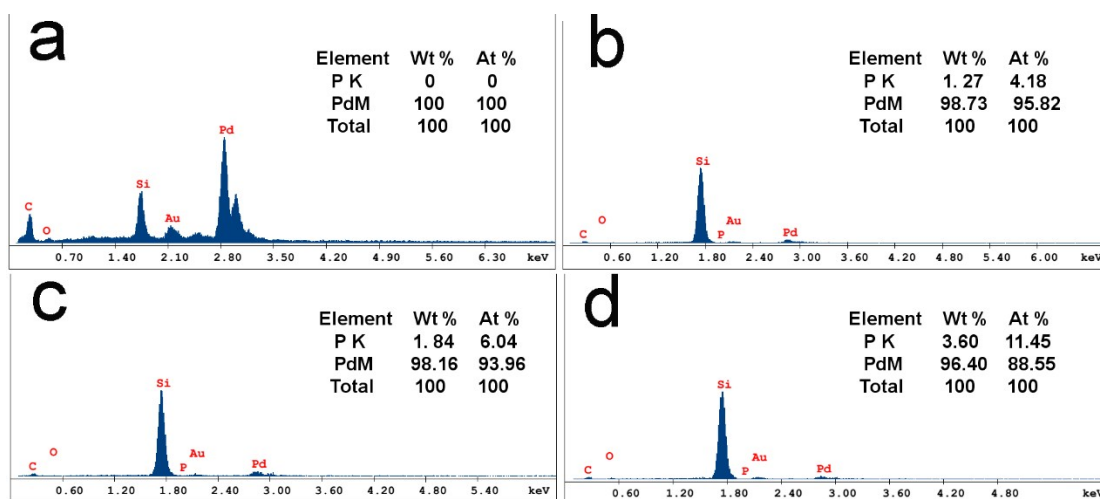

Figure S1: EDS patterns of the Pd (a), Pd<sub>4</sub>/P<sub>1</sub> (b), Pd<sub>2</sub>/P<sub>1</sub> (c) and Pd<sub>1</sub>/P<sub>1</sub> (d). Slide glass were used as EDS substrates.

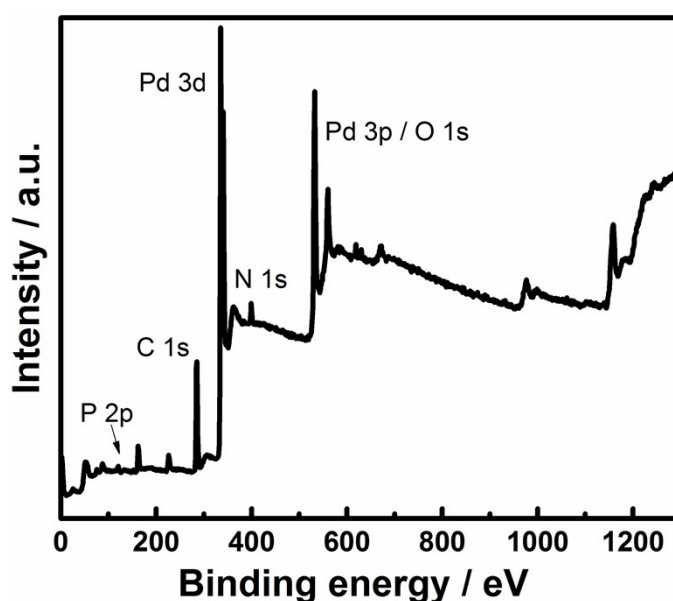

Figure S2: XPS spectra of the Pd<sub>2</sub>/P<sub>1</sub>.

Table 1 Summary of molar ratios for catalysts based on EDS and ICP analysis

| Catalysts                       | Molar ratio by EDS (Pd/P) | Molar ratio by ICP (Pd/P) |
|---------------------------------|---------------------------|---------------------------|
| Pd <sub>4</sub> /P <sub>1</sub> | 22.92/1                   | 21.80/1                   |
| Pd <sub>2</sub> /P <sub>1</sub> | 15.56/1                   | 15.64/1                   |
| Pd <sub>1</sub> /P <sub>1</sub> | 7.73/1                    | 7.81/1                    |
